# Supplementary material for: The hexosamine biosynthesis pathway is a targetable liability in KRAS/LKB1 mutant lung cancer
Source: Springer Nature journal article supplement (doi:10.1038/s42255-020-00316-0), 2020-11-30
Supplement: 42255_2020_316_MOESM4_ESM.xlsx [file 42255_2020_316_MOESM4_ESM.xlsx]

## Sheet: Fig6-tumor volumes
Fig.6a-A549
	A549-azaserine				A549+azaserine
0	0	0	0	0	0	0	0	0
9	133.208	116.271	133.887	60.2651	127.36	94.5886	61.2929	72.6716
12	160.384	119.521	234.045	112.4	109.808	106.808	116.145	73.4919
13	230.809	201.397	287.789	115.976	136.915	119.505	202.535	96.3298
15	223.72	203.751	278.438	284.06	228.528	153.478	157.68	108.109
17	233.089	241.673	277.594	249.414	151.725	153.48	201.42	107.123
19	308.448	312.781	345.6	486.4	175.018	156.645	227.225	125.679
22	472.061	397.751	712.383	954.319	186.607	223.117	252.562	125.1
24	574.461	601.419	425.437	1105.87	204.842	235.669	245.173	151.371
Fig.6a-H460. Note: Combined results from two independent H460 xenograft experiments (n in each experiment=4) are shown here. Data from day 15 and 17 are from two independent studies
	H460-azaserine								H460+azaserine
0	0	0	0	0	0	0	0	0	0	0	0	0	0	0	0	0
8	102.494	75.2713	64.061	82.1305					96.8	169.058	217.328	73.9749
9	79.7309	32.8864	87.1711	54.2001					14.1687	156.735	51.7979	100.479
10	152.232	130.416	137.218	96.3189					219.04	131.22	89.2375	98.4315
11	362.459	144.057	361.594	142.431					39.5852	54.8081	338.687	150.79
12	630.211	313.941	704.24	272.812					321.311	617.98	111.24	105.875
13	1409.17	570.332	483.973	123.466					64.8603	85.5729	562.742	599.886
14	866.4	260.362	1454.87	584.828					634.07	664.848	83.9402	137.039
15	967.747	276.138	1442.52	546.092	1611.69	1029.41	879.927	239.944	660.421	732.655	105.462	277.301	366.846	157.365	467.123	179.901
16	1042.31	325.55	1690.62	599.76					773.663	1183	148.586	126.914
17	1372.96	397.373	667.313	2048.29	2116.33	1528.68	1145.63	347.531	1008	1163.03	259.92	143.651	81.634	99.4873	887.446	1126.27
19	3331.18	1894.29	1311.95	548.856					116.032	132.797	1121.56	1070.67
22	3250.19	3209.34	1787.05	514.856					223.715	421.323	1425	1015.8
Fig.6a-Calu-1
	Calu-1-azaserine					Calu-1+azaserine
0	0	0	0	0	0	0	0	0	0	0
7	60.6166	120.96	22.2918	77.6822	37.8225	64.2661	61.3107	70.4211	37.4646	46.4973
9	61.6814	79.0064	64.7424	61.8216	87.725	46.464	78.652	37.7208	62.197	53.621
13	48.8628	118.496	67.4148	55.545	130.549	61.8344	63.2165	97.686	61.7796	64.7424
22	105.004	131.416	113.961	82.9093	112.218	80.0022	69.696	61.2422	162.952	84.1629
25	107.648	147.456	161.268	213.16	168.394	90.8084	77.376	168.945	153.735	70.2751
31	222.95	201.343	185.22	220.672	282.12	132.618	147.573	132.84	150.877	235.688
Fig.6a-Calu-6
	Calu-6-azaserine				Calu-6+azaserine
0	0	0	0	0	0	0	0	0
7	28.5763	120.188	82.9883	47.9829	81.12	69.4192	49.5074	105.557
9	47.5723	82.3543	56.2367	130.605	73.9794	79.8137	73.0667	118.009
11	74.36	126.15	93.4087	225.264	82.6686	90.4793	163.054	148.149
13	90.3291	368.475	164.361	256.136	145.926	148.282	153.854	324.322
15	120.823	370.697	184.876	368.437	187.706	268.584	322.452	420.995
17	171.094	458.627	266.31	735.307	427.454	467.754	247.574	593.267
Fig.6e-H460.
	H460-GFPT2-Dox					H460-GFPT2+Dox
0	0	0	0	0	0	0	0	0	0	0
7	60.0845	110.678	31.046	101.929	128.993	0	44.6895	35.5153	20.7052	0
9	349.282	389.344	113.132	262.848	183.787	152.46	45.36	217.8	34.656	0
11	803.342	872.554	182.77	532.386	564.569	746.368	59.094	517.72	71.152	0
13	1101.97	1361.3	382.191	942.655	703.994	946.798	69.285	919.347	87.3574	30.7677
15	2238.89	2395.07	549.096	1177.13	789.9	1679.83	147.91	2075.79	176.005	28.1641
17	2307.93	2760.48	749.25	1448.22	1466.63	2020.29	209.722	1745.08	208.75	25.6458
Fig.6e-H157
	H157-GFPT2-Dox					H157-GFPT2+Dox
0	0	0	0	0	0	0	0	0	0	0
6	159.359	158.438	212.987	73.6646	281.191	79.3626	79.524	41.024	51.5363	54.4569
8	567.84	330.926	648.821	198.799	529	121.49	281.25	66.5594	137.523	78.0325
10	1338.48	798.401	937.279	279.506	1137.6	291.721	695.708	99.9141	79.7587	165.528
12	1413.09	1002.47	1047.3	374.598	1434.22	282.787	956.812	107.039	100.454	188.314
14	1586.36	2005.19	2012.52	616.934	1960.72	556.563	1039.42	268.809	242.275	300.278
16	2237.07	2657.81	2259.61	726.543	2230.92	491.958	1144.47	392.006	316.24	385.922

## Sheet: Extended Fig9e,f,g,k
Extended Fig.9e
	H460-sgNC-Dox					H460-sgNC+Dox
0	0	0	0	0	0	0	0	0	0	0
5	0	0	2.025	6.534	9.0625	0	0.288	0	12.7575	0
7	87.725	0	19.602	55.225	17.9685	25.272	25.3265	44.982	25.5915	38.266
9	35.2	0	74.88	76.7295	71.442	325.424	59.168	64.827	28.175	49.368
11	47.432	29.4	138.6	107.217	66.816	581.457	99.7195	95.506	49.368	102.06
13	84.564	41.6	228.152	127.832	138.083	902.956	163.37	131.196	88.938	178.176
15	137.312	70	436.774	224.325	410.478	1485.34	210.392	169	106.624	240.1
17	202.8	149.4	729	331.33	521.703	1704.44	398.544	229.365	120.094	327.652
19	349.272	251.256	2263.25	364.8	719.104	2229.3	491.3	272.812	153.6	377.496
21	367.416	281.25	2440.25	617.98	1291.3	2918.9	591.3	293.486	165.584	496.86
Extended Fig.9f
	H157-sgNC-Dox					H157-sgNC+Dox
0	0	0	0	0	0	0	0	0	0	0
6	23.8875	0	15.979	32.856	4.212	93.636	0	41.454	2.916	5.4
8	52.6965	0	50.784	73.75	56.448	190.125	14.4	68.4285	14.504	21.964
10	75	34.656	85.176	108.841	95.8455	290.304	59.904	104.43	39.69	94.08
12	142.884	80.631	140.306	209.952	126.514	416.295	99.7195	268.363	59.904	181.804
14	213.16	166.464	211.722	316.028	202.176	429.792	158.76	343.188	94.08	249.158
16	297.6	221.778	301.806	414.05	295.856	527.982	236.65	445.815	136.93	323.2
18	407.932	343.914	450.636	715	388.8	787.32	337.561	659.016	219.006	455.618
20	756.25	585	856.326	1549.12	1015.62	1393.92	772.524	1428.3	459.418	1101.42
22	1264.76	988.268	1437.82	2458.95	1533.04	2532.55	1284.86	2119.81	727.65	1727.94
Extended Fig.9g
	Calu-1-sgGFPT2-Dox					Calu-1-sgGFPT2+Dox
0	0	0	0	0	0	0	0	dead	0	0
9	21.512	30.9919	0	0	46.95	0	0		50.5451	69.0204
15	16.2043	22.2402	37.1091	0	32.2917	31.7692	0		26.8693	44.1437
19	28.1771	68.4215	33.2961	0	19.4149	36.5978	0		39.3372	50.1592
23	38.7714	30.324	34.88	49.726	27.6715	33.6524	0		46.746	66.2794
29	22.8262	40.8271	36.428	79.2588	21.1941	40.2841	0		35.4999	33.637
37	47.9085	50.4581	34.0403	66.125	38.1855	39.0369	57.434		60.6234	62.1075
43	29.2694	37.9371	62.1383	183.081	35.6668	81.1876	127.619		67.0601	79.1951
47	47.1942	50.784	56.448	182.214	63.936	90.8334	112.719		113.481	96.8073
51	40.3065	46.5359	115.843	52.1437	175.718	92.0256	83.1842		132.484	152.276
55	41.067	38.5385	62.775	63.076	224.08	56.0776	121.876		133.325	181.65
Extended Fig.9k
	H460-GFPT2 WT					H460-GFPT2 KO-#1					H460-GFPT2 KO-#2
0	0	0	0	0	0	0	0	0	0	0	0	0	0	0	0
7	0	63.75	49.6125	74.36	58.5385	19.22	10.9375	0	23.409	0	0	0	0	0	0
9	234.196	122.536	218.045	194.078	175.827	38.6518	28.512	0	35.301	85.6745	0	20.1465	0	0	0
11	252.062	497.421	214.357	286.81	457.459	77.3325	180.839	48.074	51.84	47.8691	0	0	0	40.96	0
13	1132.3	735.488	604.675	405.72	757.927	178.605	44.376	215.016	55.08	354.784	0	7.406	29.4335	42.588	0
15	1439.41	1181.71	761.599	472.025	1180.88	148.724	59.1774	607.868	170.582	1247.94	0	52.5742	21.107	33.696	0
