# Supplementary figures and images for: The hexosamine biosynthesis pathway is a targetable liability in KRAS/LKB1 mutant lung cancer
Source: Springer Nature journal article supplement (doi:10.1038/s42255-020-00316-0), 2020-11-30

Uncropped WB data-Extended Data Figure 9-1

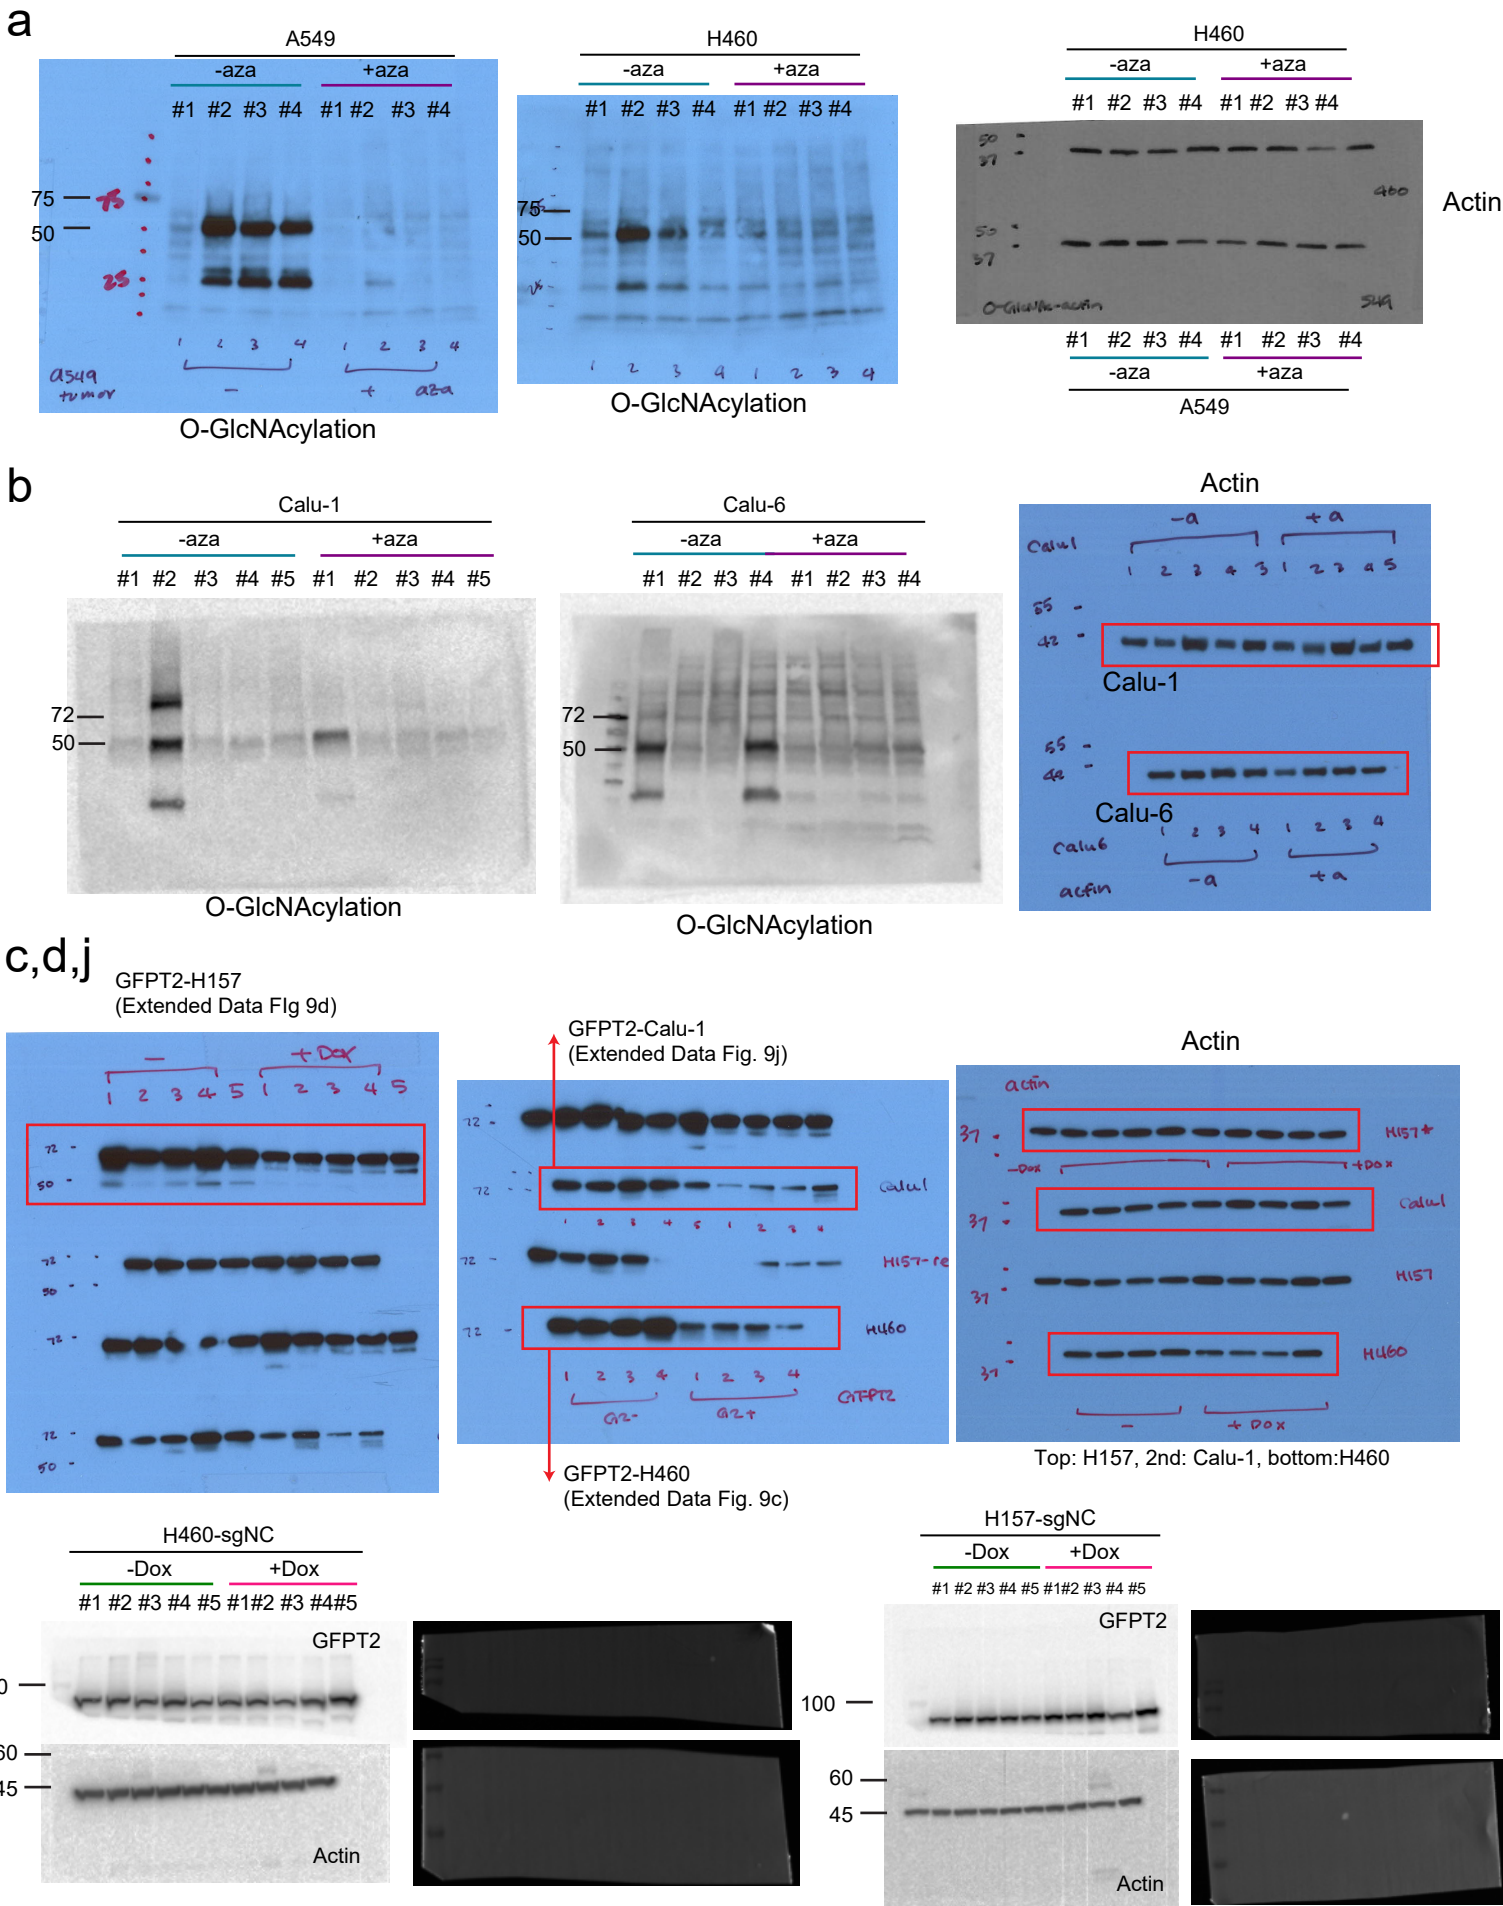

# Uncropped WB data-Extended Data Figure 9-2

I

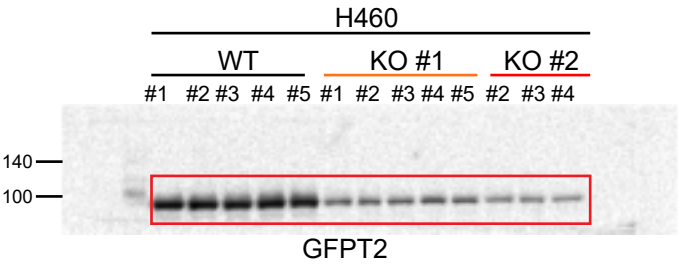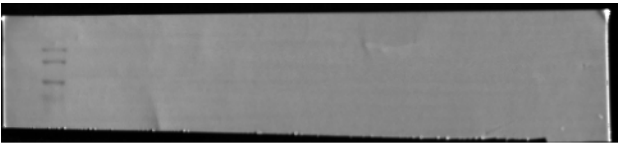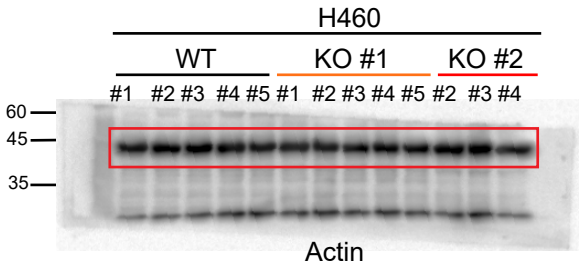

Supplement: 42255_2020_316_MOESM14_ESM.pdf [file 42255_2020_316_MOESM14_ESM.pdf]

Uncropped WB data  
Figure 2d

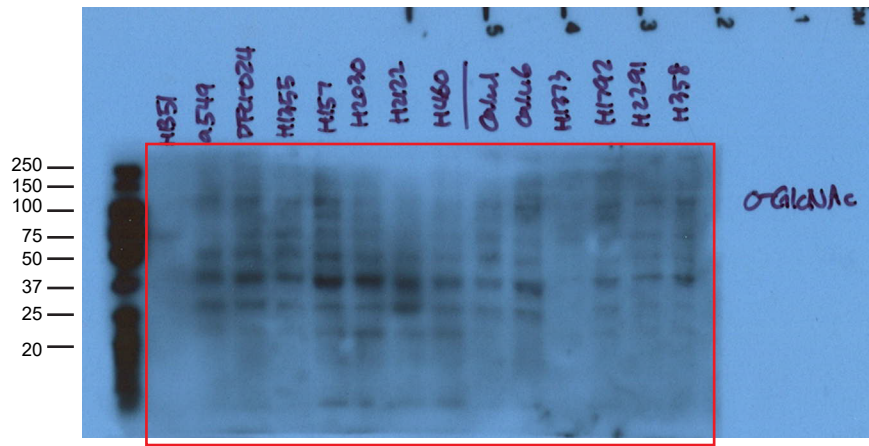

O-GlcNAcylation

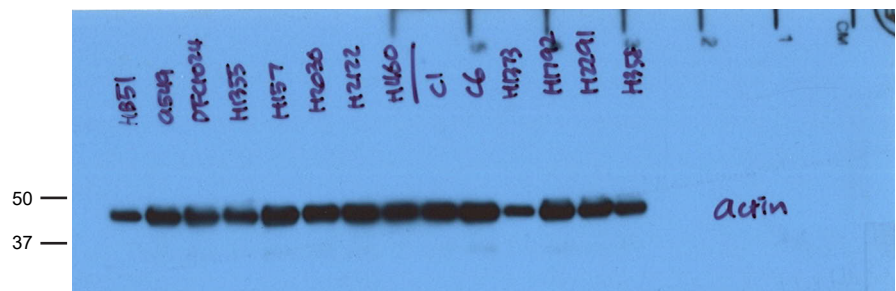

Actin

Supplement: 42255_2020_316_MOESM5_ESM.pdf [file 42255_2020_316_MOESM5_ESM.pdf]

Figure 5g

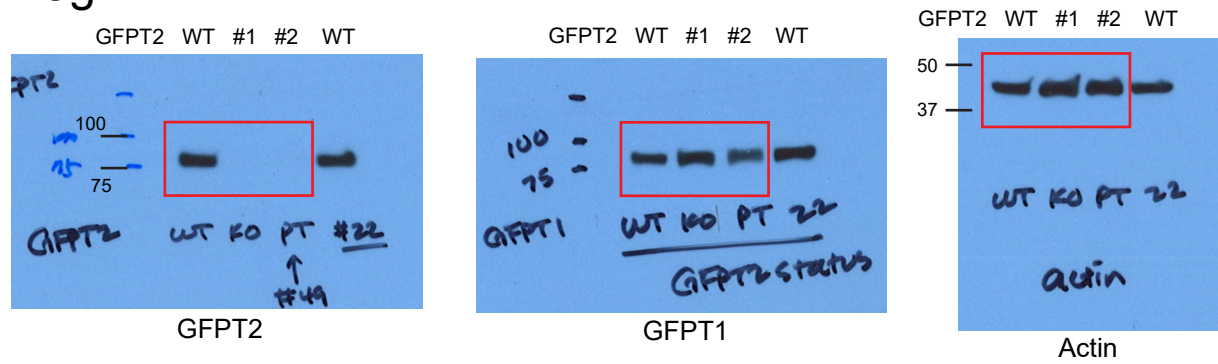

Supplement: 42255_2020_316_MOESM7_ESM.pdf [file 42255_2020_316_MOESM7_ESM.pdf]

Uncropped WB data  
Extended Data Figure 2c

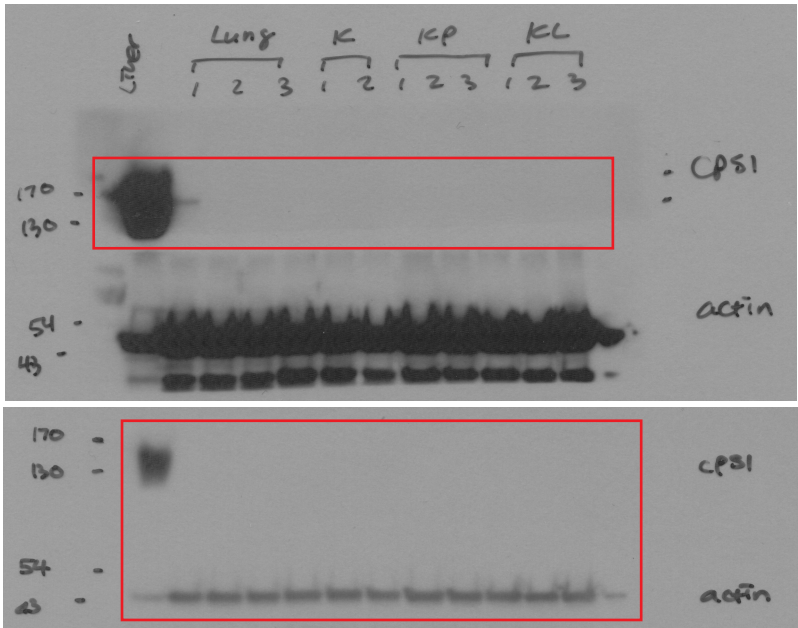

CPS1 (longer exposure and shorter exposure) and Actin

Supplement: 42255_2020_316_MOESM8_ESM.pdf [file 42255_2020_316_MOESM8_ESM.pdf]
